# Supplementary material for: Dietary patterns and breast cancer risk, prognosis, and quality of life: A systematic review
Source: Frontiers journal article supplement (doi:10.3389/fnut.2022.1057057), 2023-01-20
Supplement: Data_Sheet_1.pdf [file Data_Sheet_1.pdf]

## NEWCASTLE - OTTAWA QUALITY ASSESSMENT SCALE

### CASE CONTROL STUDIES

Note: A study can be awarded a maximum of one star for each numbered item within the Selection and Exposure categories. A maximum of two stars can be given for Comparability

#### Selection

##### 1) Is the case definition adequate?

- a) yes, with independent validation\*
- b) yes, eg record linkage or based on self reports
- c) no description

##### 2) Representativeness of the cases

- a) consecutive or obviously representative series of cases\*
- b) potential for selection biases or not stated

##### 3) Selection of Controls

- a) community controls\*
- b) hospital controls
- c) no description

##### 4) Definition of Controls

- a) no history of disease (endpoint) \*
- b) no description of source

#### Comparability

##### 1) Comparability of cases and controls on the basis of the design or analysis

- a) study controls for \_\_\_\_\_ (Select the most important factor.) \*
- b) study controls for any additional factor \*(This criteria could be modified to indicate specific control for a second important factor.)

#### Exposure

##### 1) Ascertainment of exposure

- a) secure record (eg surgical records)\*
- b) structured interview where blind to case/control status\*
- c) interview not blinded to case/control status
- d) written self report or medical record only
- e) no description

##### 2) Same method of ascertainment for cases and controls

- a) yes \*
- b) no

##### 3) Non-Response rate

- a) same rate for both groups \*
- b) non respondents described
- c) rate different and no designation

## NEWCASTLE - OTTAWA QUALITY ASSESSMENT SCALE

### COHORT STUDIES

Note: A study can be awarded a maximum of one star for each numbered item within the Selection and Outcome categories. A maximum of two stars can be given for Comparability

#### Selection

##### 1) Representativeness of the exposed cohort

- a) truly representative of the average \_\_\_\_\_ (describe) in the community\*
- b) somewhat representative of the average \_\_\_\_\_ in the community\*
- c) selected group of users eg nurses, volunteers
- d) no description of the derivation of the cohort

##### 2) Selection of the non exposed cohort

- a) drawn from the same community as the exposed cohort\*
- b) drawn from a different source
- c) no description of the derivation of the non exposed cohort

##### 3) Ascertainment of exposure

- a) secure record (eg surgical records)\*
- b) structured interview\*
- c) written self report
- d) no description

##### 4) Demonstration that outcome of interest was not present at start of study

- a) yes\*
- b) no

#### Comparability

##### 1) Comparability of cohorts on the basis of the design or analysis

- a) study controls for \_\_\_\_\_ (select the most important factor)\*
- b) study controls for any additional factor\* (This criteria could be modified to indicate specific control for a second important factor.)

#### Outcome

##### 1) Assessment of outcome

- a) independent blind assessment\*
- b) record linkage\*
- c) self report
- d) no description

##### 2) Was follow-up long enough for outcomes to occur

- a) yes (select an adequate follow up period for outcome of interest)\*
- b) no

##### 3) Adequacy of follow up of cohorts

- a) complete follow up - all subjects accounted for\*
- b) subjects lost to follow up unlikely to introduce bias - small number lost - > \_\_\_\_ % (select

- an adequate %) follow up, or description provided of those lost)\*  
 c) follow up rate < \_\_\_\_% (select an adequate %) and no description of those lost  
 d) no statement

**Figure 2** Cochrane risk map of bias for three studies generated by RevMan

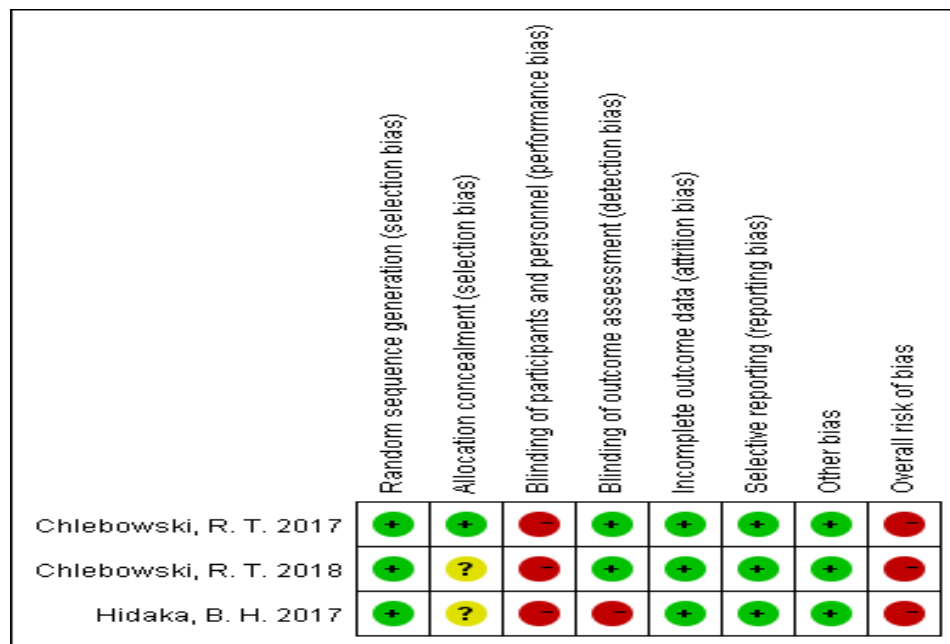

**Methodological Quality of Included Studies**

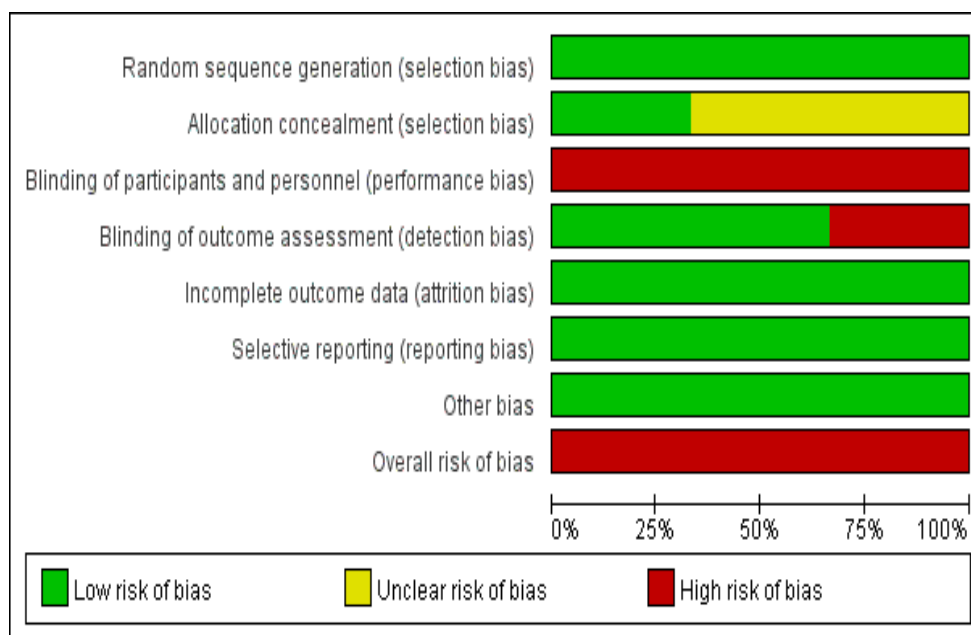

**The Distribution of the Methodological Quality of Included Studies**

| Bias                                                      | Low risk | Unclear risk | High risk |
|-----------------------------------------------------------|----------|--------------|-----------|
| Random sequence generation (selection bias)               |          |              |           |
| Allocation concealment (selection bias)                   |          |              |           |
| Blinding of participants and personnel (performance bias) |          |              |           |
| Blinding of outcome assessment (detection bias)           |          |              |           |
| Incomplete outcome data (attrition bias)                  |          |              |           |
| Selective reporting (reporting bias)                      |          |              |           |
| Other bias                                                |          |              |           |
| Overall risk of bias                                      |          |              |           |

**Risk of bias table**
